# Supplementary material for: Consumption of low-digestible sugars increase susceptibility to Salmonella Typhimurium infection
Source: Research Square preprint supplement (doi:10.21203/rs.3.rs-8058589/v1), 2025-12-08
Supplement: Supplementary file 1 [file 0c62995daf34458722733645.xlsx]

## Sheet: strains
Strain	Genotype	Refererence	Used in Figure
SB300	SL1344 derivative	Hoiseth SK, Stocker BA (1981) Aromatic-dependent Salmonella typhimurium are non-virulent and effective as live vaccines. Nature 291: 238–239.	Figures 1A-J, 2, 3, 4B-E, 6, 7
Z3664	ΔaraB:aphT	this study	Figures 1K-L
pM972 SB300	psicA gfp	Sturm A, Heinemann M, Arnoldini M, Benecke A, Ackermann M, Benz M, Dormann J, Hardt WD. The cost of virulence: retarded growth of Salmonella Typhimurium cells expressing type III secretion system 1. PLoS Pathog. 2011 Jul;7(7):e1002143. doi: 10.1371/journal.ppat.1002143. Epub 2011 Jul 28. PMID: 21829349; PMCID: PMC3145796.	Figure 4A
SV161	∆invG	Kaniga, K., Bossio, J. C. & Galán, J. E. The Salmonella typhimurium invasion genes invF and invG encode homologues to the PulD and AraC family of proteins. Mol. Microbiol. 13, 555-568 (1994).	Figure 4B-E, S2
M2730	∆ssaV	Periaswamy B, Maier L, Vishwakarma V, Slack E, Kremer M, et al. (2012) Live Attenuated S. Typhimurium Vaccine with Improved Safety in Immuno-Compromised Mice. PLOS ONE 7(9): e45433. https://doi.org/10.1371/journal.pone.0045433	Figure 4B-E, S2
M2702	invG ∆ssaV	Periaswamy B, Maier L, Vishwakarma V, Slack E, Kremer M, et al. (2012) Live Attenuated S. Typhimurium Vaccine with Improved Safety in Immuno-Compromised Mice. PLOS ONE 7(9): e45433. https://doi.org/10.1371/journal.pone.0045433	Figure 4B-E
M1318	ΔsopE	Müller AJ, Hoffmann C, Galle M, Van Den Broeke A, Heikenwalder M, Falter L, Misselwitz B, Kremer M, Beyaert R, Hardt WD. The S. Typhimurium effector SopE induces caspase-1 activation in stromal cells to initiate gut inflammation. Cell Host Microbe. 2009 Aug 20;6(2):125-36. doi: 10.1016/j.chom.2009.07.007. PMID: 19683679.	Figure 4F-H
M714	ΔsipA	Hapfelmeier S, Ehrbar K, Stecher B, Barthel M, Kremer M, Hardt WD. Role of the Salmonella pathogenicity island 1 effector proteins SipA, SopB, SopE, and SopE2 in Salmonella enterica subspecies 1 serovar Typhimurium colitis in streptomycin-pretreated mice. Infect Immun. 2004 Feb;72(2):795-809. doi: 10.1128/IAI.72.2.795-809.2004. PMID: 14742523; PMCID: PMC321604.	Figure 4F-H
M509	ΔsopB	Hapfelmeier S, Ehrbar K, Stecher B, Barthel M, Kremer M, Hardt WD. Role of the Salmonella pathogenicity island 1 effector proteins SipA, SopB, SopE, and SopE2 in Salmonella enterica subspecies 1 serovar Typhimurium colitis in streptomycin-pretreated mice. Infect Immun. 2004 Feb;72(2):795-809. doi: 10.1128/IAI.72.2.795-809.2004. PMID: 14742523; PMCID: PMC321604.	Figure 4F-H
M202	ΔsopE::aphT	Hapfelmeier S, Ehrbar K, Stecher B, Barthel M, Kremer M, Hardt WD. Role of the Salmonella pathogenicity island 1 effector proteins SipA, SopB, SopE, and SopE2 in Salmonella enterica subspecies 1 serovar Typhimurium colitis in streptomycin-pretreated mice. Infect Immun. 2004 Feb;72(2):795-809. doi: 10.1128/IAI.72.2.795-809.2004. PMID: 14742523; PMCID: PMC321604.	Figure 4F-H
Z1401/M913	fliGHI::Tn10	Ehrbar K, Friebel A, Miller SI, Hardt W 2003. Role of the Salmonella Pathogenicity Island 1 (SPI-1) Protein InvB in Type III Secretion of SopE and SopE2, Two Salmonella Effector Proteins Encoded Outside of SPI-1. J Bacteriol 185:. https://doi.org/10.1128/jb.185.23.6950-6967.2003	Figure 4F-H
M708	Δ4; ΔsopE ΔsipA ΔsopB ΔsopE2	Hapfelmeier S, Ehrbar K, Stecher B, Barthel M, Kremer M, Hardt WD. Role of the Salmonella pathogenicity island 1 effector proteins SipA, SopB, SopE, and SopE2 in Salmonella enterica subspecies 1 serovar Typhimurium colitis in streptomycin-pretreated mice. Infect Immun. 2004 Feb;72(2):795-809. doi: 10.1128/IAI.72.2.795-809.2004. PMID: 14742523; PMCID: PMC321604.	Figure 4F-H
Z8863	Δssav ΔinvG WITS21:cat	this study	Figure 5
M3147	WITS 1 (aphT)	Grant AJ, Restif O, McKinley TJ, Sheppard M, Maskell DJ, et al. (2008) Modelling within-Host Spatiotemporal Dynamics of Invasive Bacterial Disease. PLOS Biology 6(4): e74. https://doi.org/10.1371/journal.pbio.0060074	Figure S1,5
M3148	WITS 2 (aphT)	Grant AJ, Restif O, McKinley TJ, Sheppard M, Maskell DJ, et al. (2008) Modelling within-Host Spatiotemporal Dynamics of Invasive Bacterial Disease. PLOS Biology 6(4): e74. https://doi.org/10.1371/journal.pbio.0060075	Figure S2
M3149	WITS 11 (aphT)	Grant AJ, Restif O, McKinley TJ, Sheppard M, Maskell DJ, et al. (2008) Modelling within-Host Spatiotemporal Dynamics of Invasive Bacterial Disease. PLOS Biology 6(4): e74. https://doi.org/10.1371/journal.pbio.0060076	Figure S3
M3150	WITS 13 (aphT)	Grant AJ, Restif O, McKinley TJ, Sheppard M, Maskell DJ, et al. (2008) Modelling within-Host Spatiotemporal Dynamics of Invasive Bacterial Disease. PLOS Biology 6(4): e74. https://doi.org/10.1371/journal.pbio.0060077	Figure S4
M3151	WITS 17 (aphT)	Grant AJ, Restif O, McKinley TJ, Sheppard M, Maskell DJ, et al. (2008) Modelling within-Host Spatiotemporal Dynamics of Invasive Bacterial Disease. PLOS Biology 6(4): e74. https://doi.org/10.1371/journal.pbio.0060078	Figure S5

## Sheet: carbohydrates
Carbohydrates	Manufacturer	Reference
L-(+)-Arabinose	Sigma-Aldrich	10839
D-(-)-arabinose	Sigma-Aldrich	10850
Lactulose	Sigma-Aldrich	61360
Maltitol	Sigma-Aldrich	M8892
D-Sorbitol	Sigma-Aldrich	85529
Meso-Erythritol	Sigma-Aldrich	E7500
Calcium Carbonate
